# Supplementary material for: Charge-induced restructuring and decomposition of bucky-diamonds
Source: Royal Society of Chemistry journal article supplement (doi:10.1039/c2jm31249b), 2012-01-01
Supplement: c2jm31249b.pdf [file c2jm31249b.pdf]

# Charge-induced Restructuring and Decomposition of Bucky-diamonds †

Lin Lai,<sup>\*a</sup> Amanda S. Barnard<sup>a</sup>

Received Xth XXXXXXXXXXXX 20XX, Accepted Xth XXXXXXXXXXXX 20XX

First published on the web Xth XXXXXXXXXXXX 200X

DOI: 10.1039/b000000x

## 1 Supplementary Information

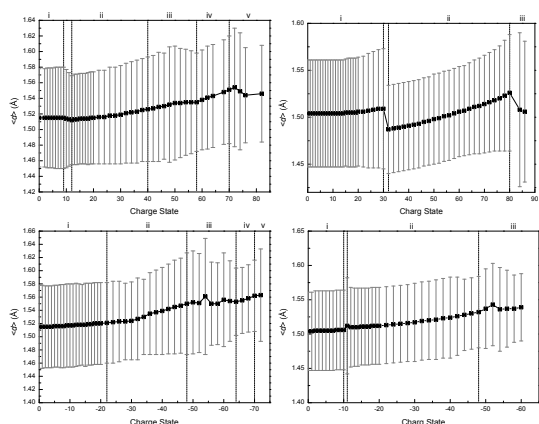

**Fig. 1** Average C–C bond distance ( $\langle d \rangle$ ) for the anionic (top) and cationic (bottom) C<sub>705</sub> (left) and C<sub>837</sub> (right) bucky-diamonds, as a function of electrons (i.e. charge state).

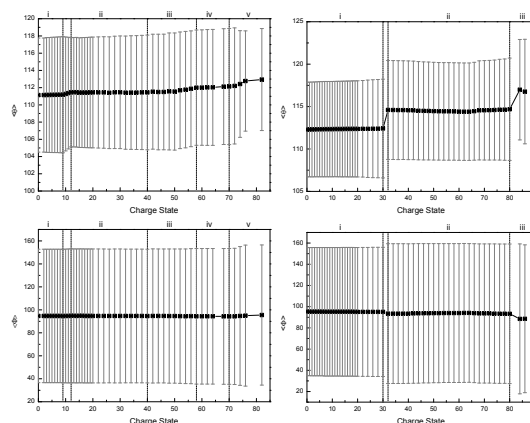

**Fig. 2** Average C–C–C bond angle ( $\langle \theta \rangle$ ) and average C–C–C–C dihedral angle ( $\langle \phi \rangle$ ) of anionic C<sub>705</sub> (left) and C<sub>837</sub> (right) bucky-diamonds, as a function of electrons (i.e. charge state).

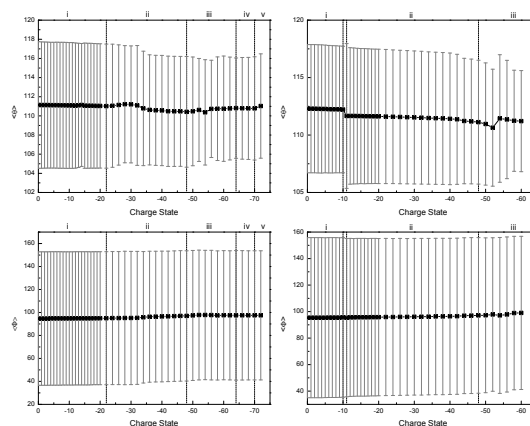

**Fig. 3** C–C–C bond angle ( $\langle \theta \rangle$ ) and average C–C–C–C dihedral angle ( $\langle \phi \rangle$ ) of cationic C<sub>705</sub> (left) and C<sub>837</sub> (right) bucky-diamonds, as a function of cations (i.e. charge state).

<sup>a</sup> CSIRO Materials Science and Engineering, Clayton, VIC, 3168, Australia.  
 Tel: +61 3 9545 7883; E-mail: lin.lai@csiro.au
